# Supplementary material for: Nickel-molybdenum nitride nanoplate electrocatalysts for concurrent electrolytic hydrogen and formate productions
Source: PubMed Central journal article supplement (PMC6877572; doi:10.1038/s41467-019-13375-z), 2019-11-25
Supplement: 41467_2019_13375_MOESM1_ESM.pdf [file 41467_2019_13375_MOESM1_ESM.pdf]

**Nickel-molybdenum Nitride Nanoplate Electrocatalysts  
for Concurrent Electrolytic Hydrogen and Formate  
Productions**

Supplementary Information

Li et al.

## Supplementary Figures

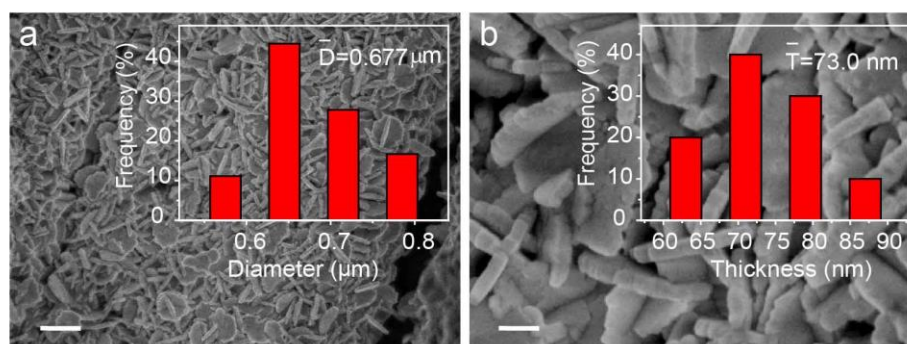

**Supplementary Fig. 1** Morphology. **(a, b)** SEM images of NiMo-Pre/CFC. The inset images in **(a)** and **(b)** are the diameter (left) and thickness (right) distributions of NiMo-Pre/CFC nanoplates. Scale bars, **(a)** 1  $\mu\text{m}$ ; **(b)** 200 nm.

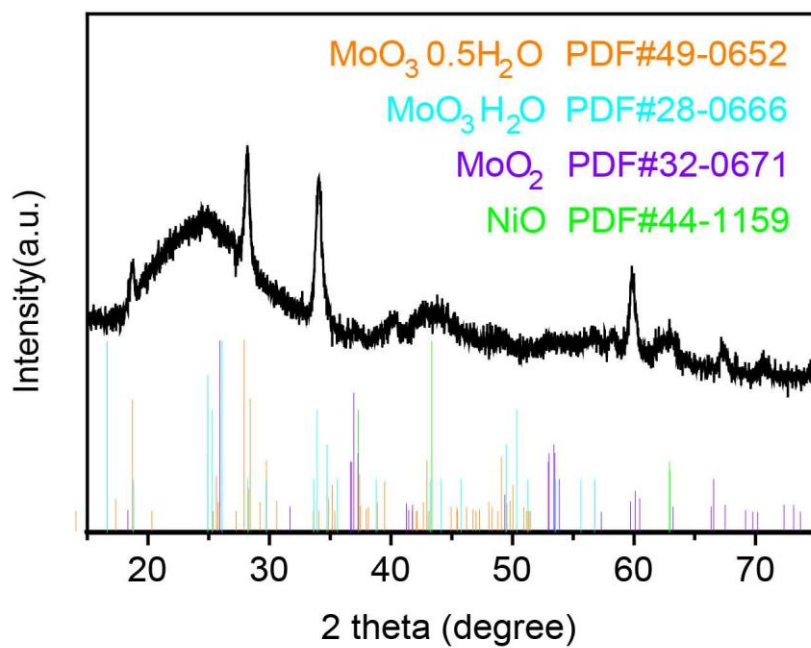

**Supplementary Fig. 2** XRD pattern of the NiMo-Pre/CFC.

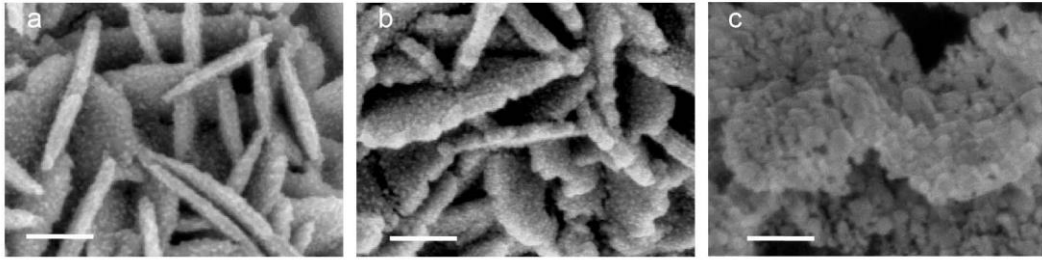

**Supplementary Fig. 3** Morphology. SEM images of Ni-Mo-N/CFC prepared at different temperatures: **(a)** 400, **(b)** 500 and **(c)** 600 °C. Scale bars, **(a)** 200 nm; **(b)** 200 nm; **(c)** 200 nm.

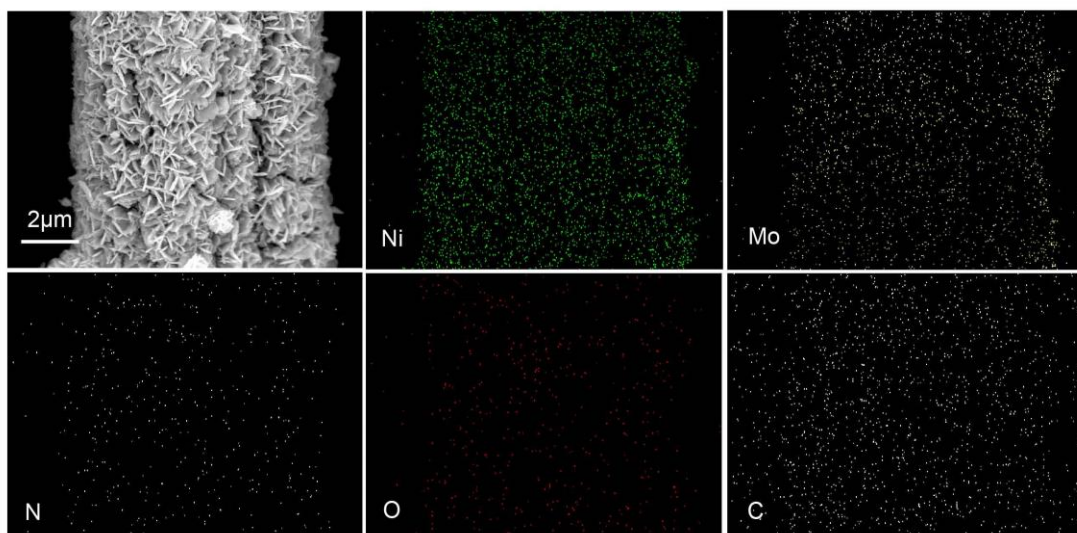

**Supplementary Fig. 4** Element mapping images of Ni, Mo, N, O and C elements in Ni-Mo-N/CFC. Colour codes: Ni (green), Mo (yellow), N (blue), O (red) and C (white)

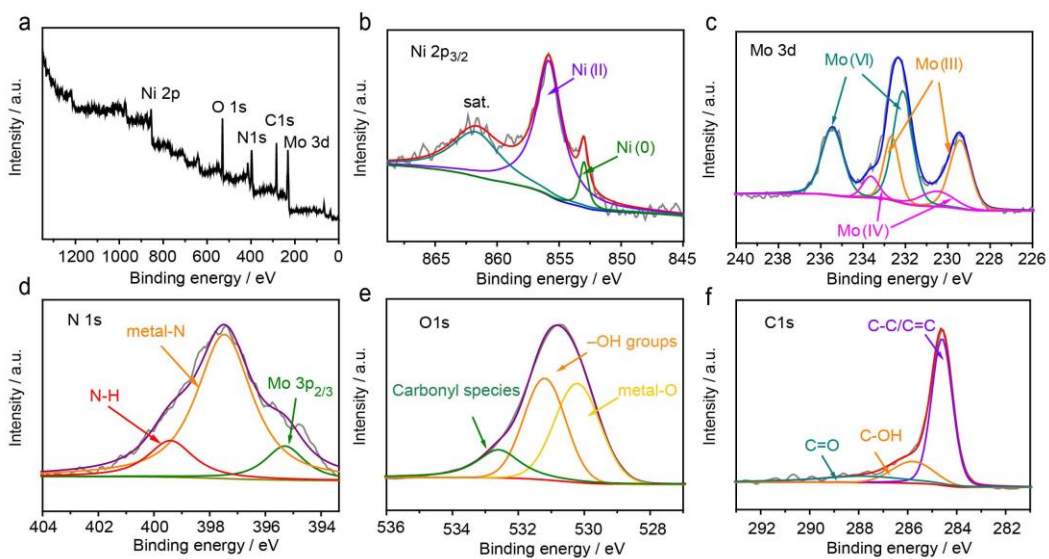

**Supplementary Fig. 5** XPS analyses of Ni-Mo-N/CFC. **(a)** XPS survey spectrum and **(b-d)** high-resolution XPS spectra of Ni-Mo-N/CFC: **(b)** Ni 2p<sub>3/2</sub>, **(c)** Mo 3d and **(d)** N 1s-Mo 3p. **(e)** O 1s and **(f)** C 1s.

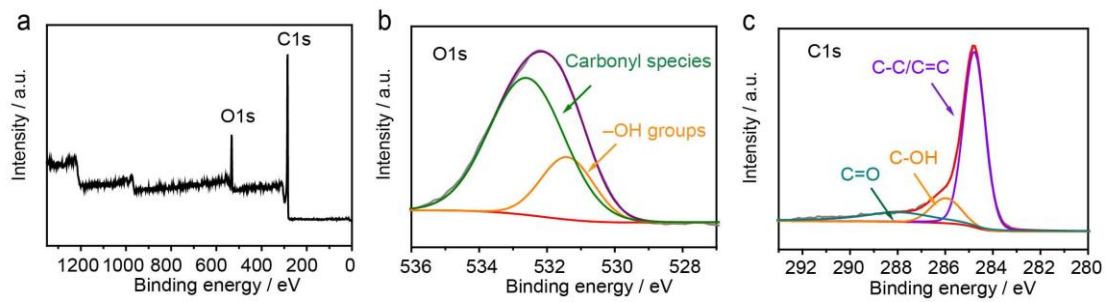

**Supplementary Fig. 6.** XPS analyses of CFC. (a) XPS survey spectrum and (b, c)

high-resolution XPS spectra of CFC: (b) O 1s and (c) C 1s.

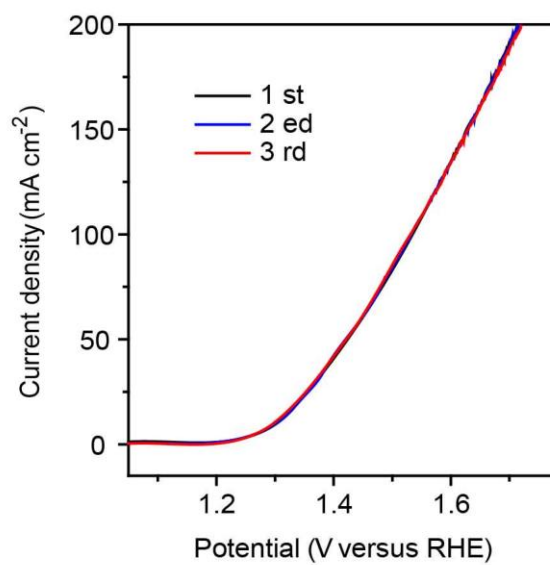

**Supplementary Fig. 7** 3 Successive LSV curves of Ni-Mo-N/CFC anode in 1.0 M KOH with 0.1 M glycerol. Scan rate, 2 mV s<sup>-1</sup>.



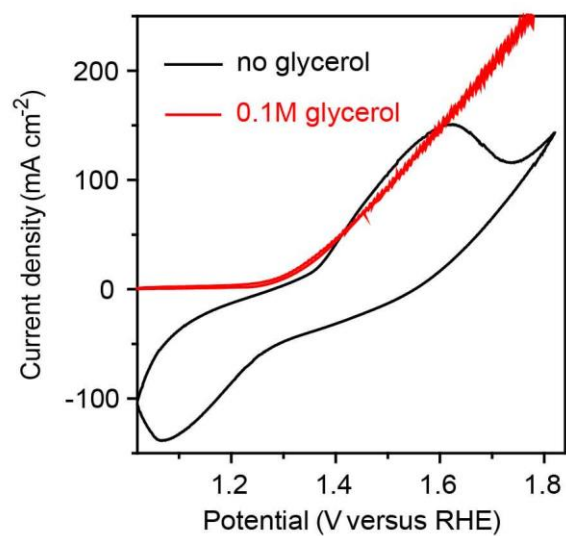

**Supplementary Fig. 8** CV curves of Ni-Mo-N/CFC anode in 1.0 M KOH with and without 0.1 M glycerol. Scan rate, 50 mV s<sup>-1</sup>. The redox couple Ni<sup>2+</sup>/Ni<sup>3+</sup> disappeared as shown in the CV of glycerol electrooxidation probably due to the indirect charge transfer mechanism that Ni<sup>2+</sup> is oxidized to Ni<sup>3+</sup> and then completely consumed in the oxidation of glycerol to form Ni<sup>2+</sup>, and makes the direct reduction of Ni<sup>3+</sup> to Ni<sup>2+</sup> impossible.<sup>1</sup>

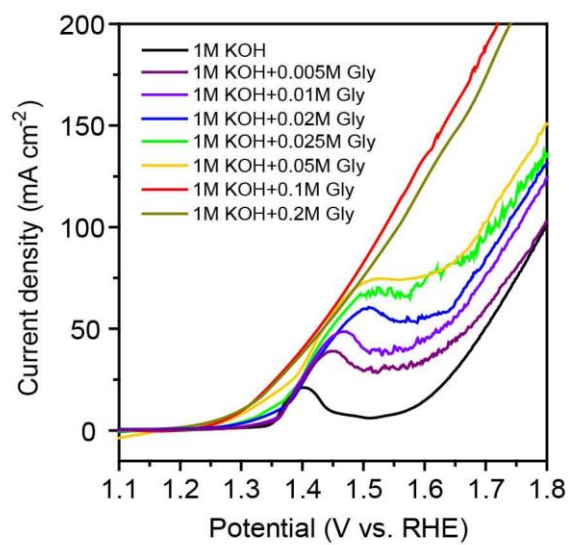

**Supplementary Fig. 9** Glycerol anodic oxidation polarization curves of Ni-Mo-N/CFC electrode in 1 M KOH with varied glycerol concentrations.

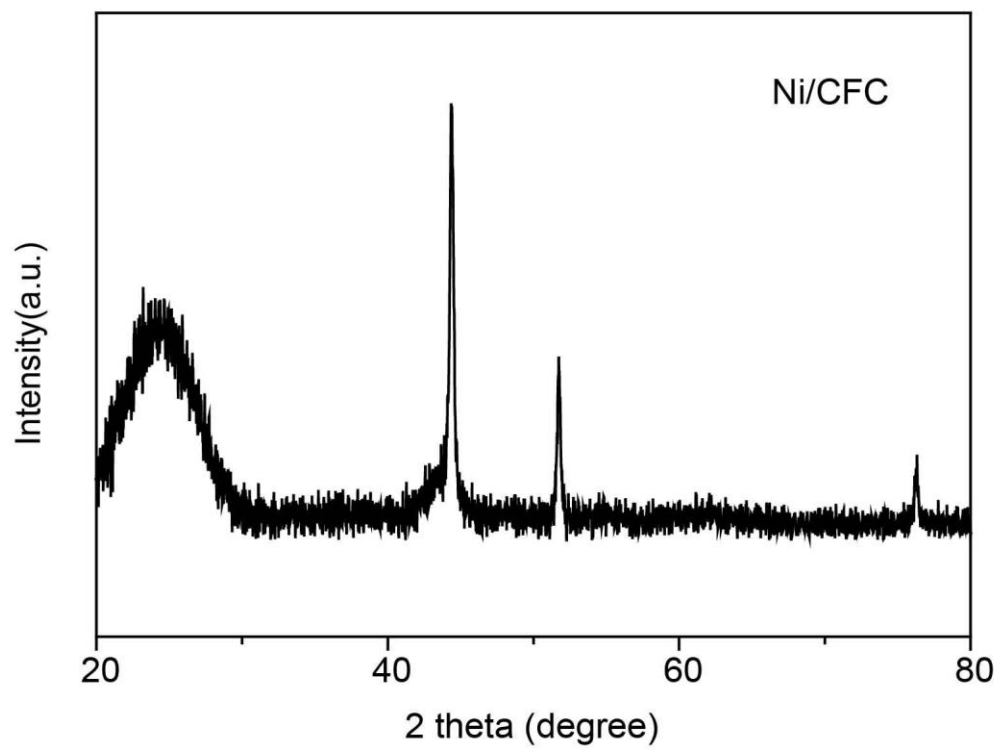

**Supplementary Fig. 10** XRD pattern of Ni/CFC.

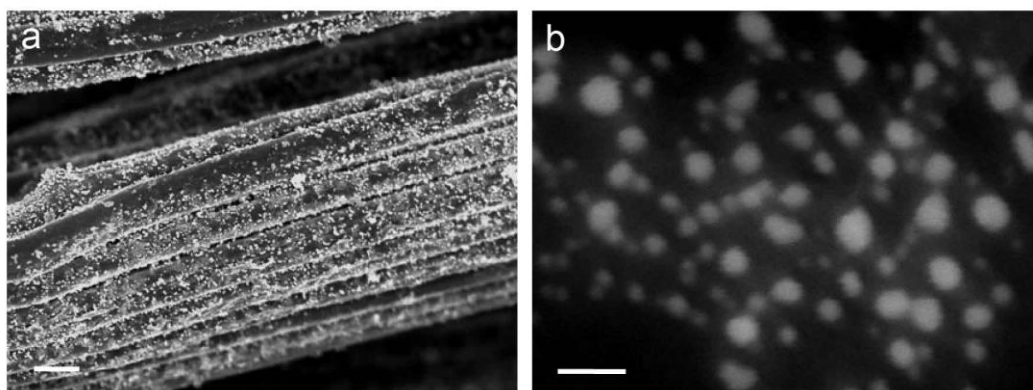

**Supplementary Fig. 11** Morphology. **(a, b)** SEM images of Ni/CFC. Scale bars, **(a)** 2  $\mu\text{m}$ ; **(b)** 50 nm.

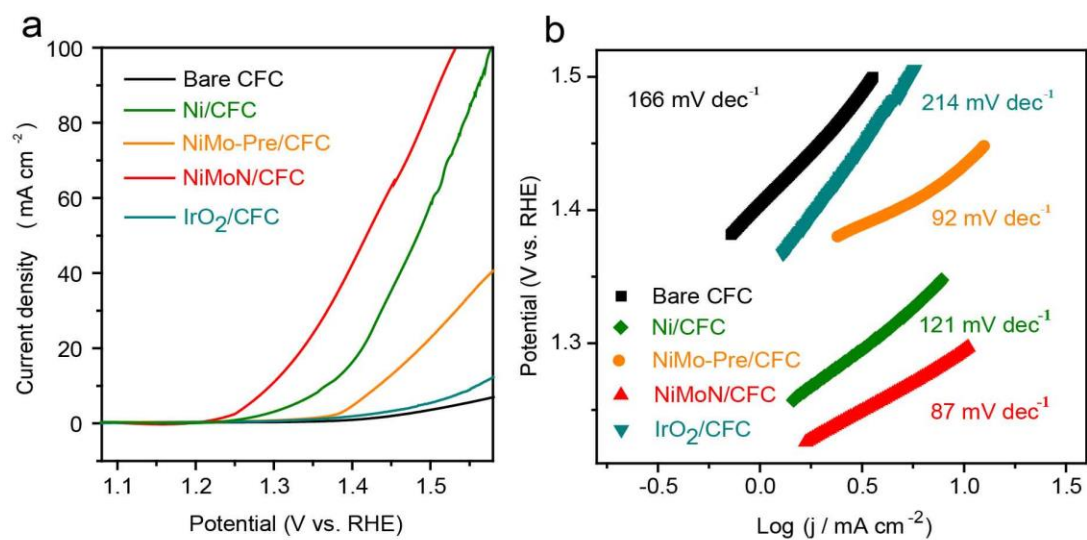

**Supplementary Fig. 12** Electrocatalytic performances of the catalysts for glycerol oxidation. **(a)** Comparisons of the glycerol anodic oxidation activities among various catalysts and **(b)** their corresponding Tafel slopes.

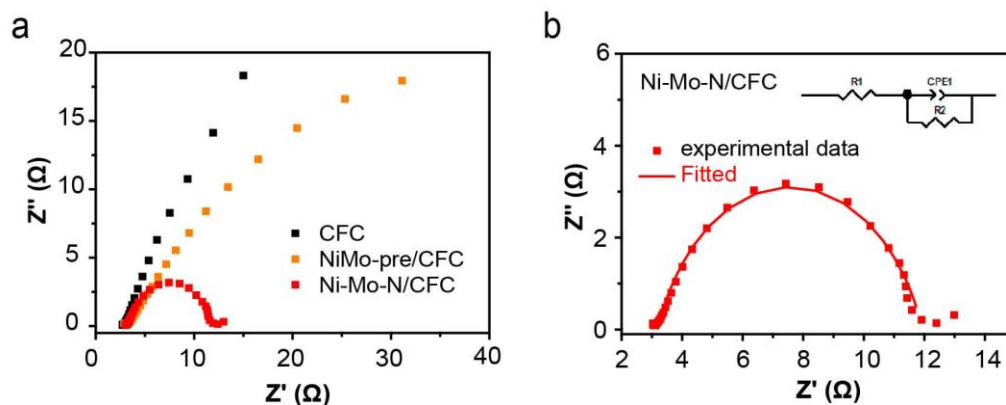

**Supplementary Fig. 13** Electrochemical impedance spectroscopy (EIS) analyses of the catalysts for glycerol oxidation. **(a)** Nyquist plots of Ni-Mo-N/CFC, NiMo-Pre/CFC, and CFC for glycerol electro-oxidation process in 1.0 M KOH with 0.1M glycerol. **(b)** The corresponding fitting Nyquist plots for Ni-Mo-N/CFC. Inset in (b) shows the proposed equivalent circuit.

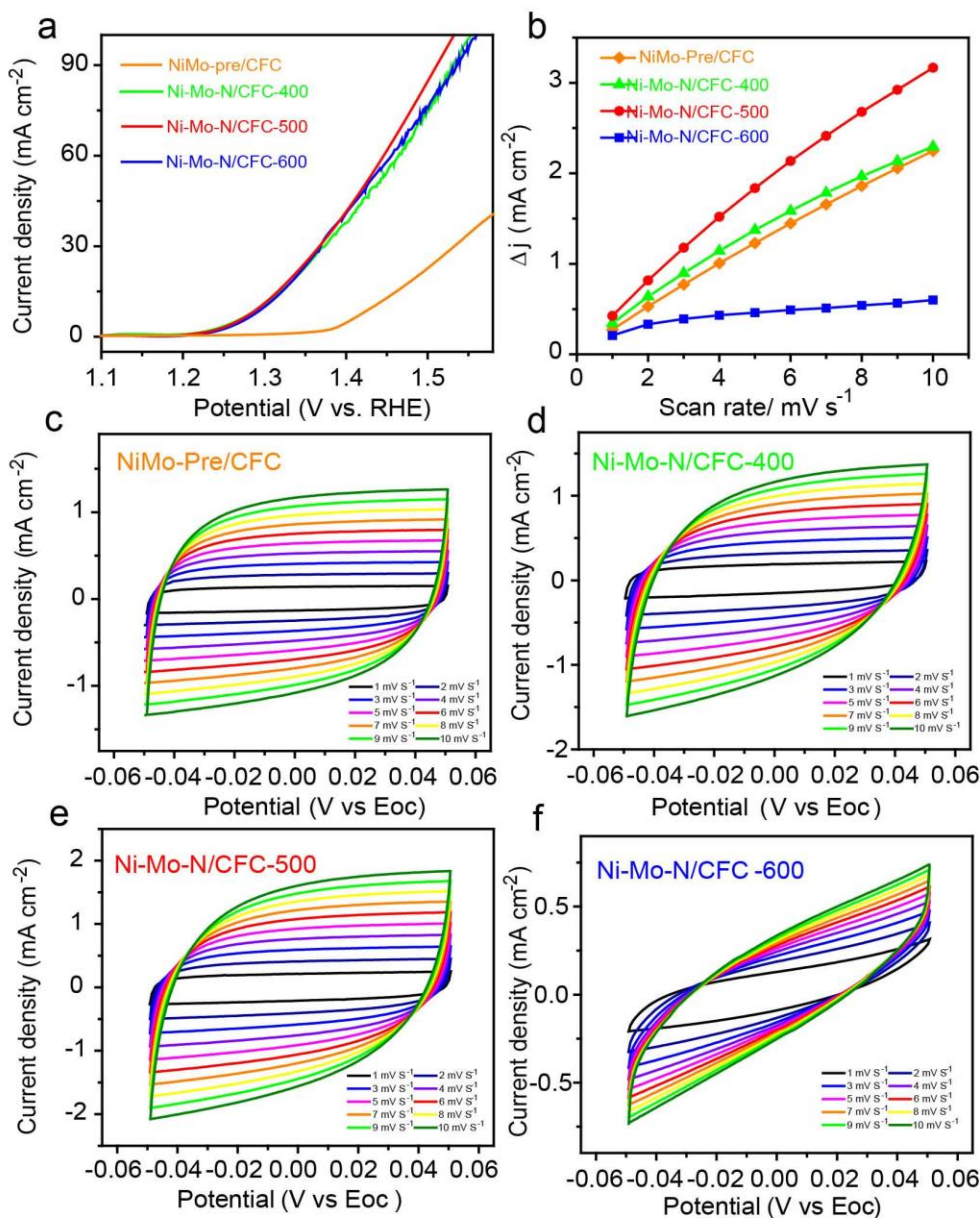

**Supplementary Fig. 14** Glycerol anodic oxidation activity tests of Ni-Mo-N/CFC catalysts treated at different temperatures. (a) Polarization curves for the glycerol anodic oxidations of different catalysts. (b) Double layer capacitance ( $C_{dl}$ ) of different catalysts. (c-f) Electrochemical surface area (ECSA) tests of different catalysts, the scanning potential range was from -0.050 V to 0.050 V versus open circuit potential (Eoc).  $E_{oc, \text{NiMo-pre/CFC}} = -0.065\text{V}$ ,  $E_{oc, \text{Ni-Mo-N/CFC-400}} = -0.220\text{V}$ ,  $E_{oc, \text{Ni-Mo-N/CFC-500}} =$

-0.177V,  $E_{OC\ Ni-Mo-N/CFC-600} = -0.215V$ .

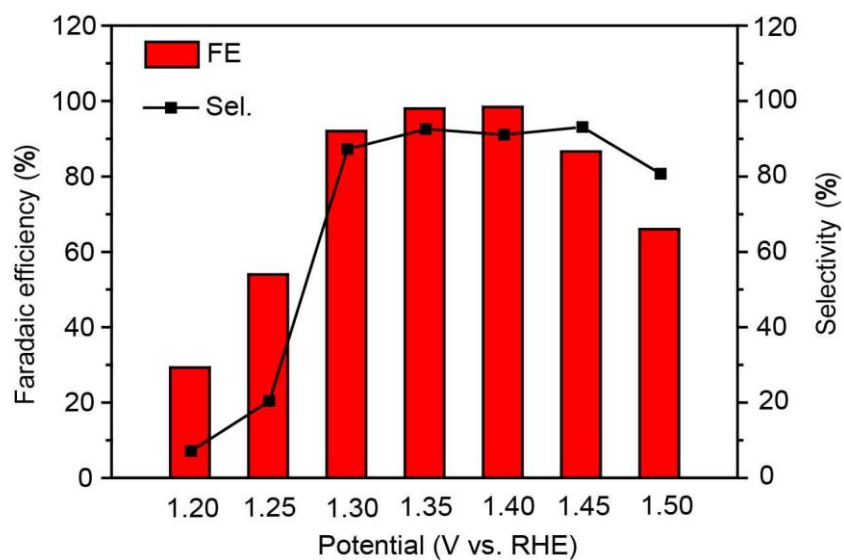

**Supplementary Fig. 15** FEs and selectivities for formate production at varied potentials.



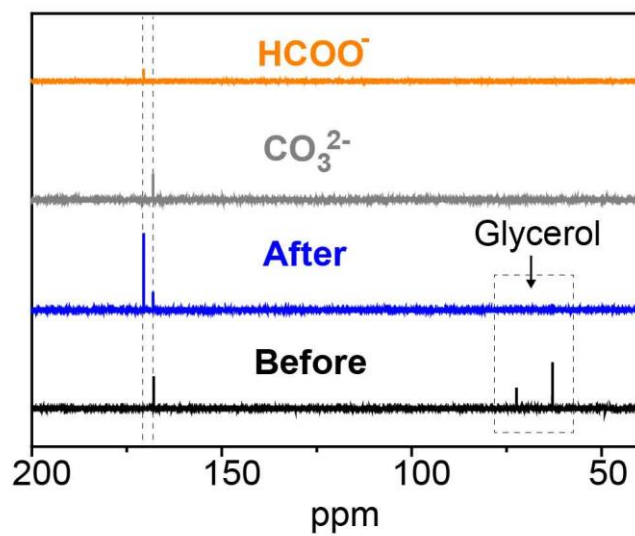

**Supplementary Fig. 16**  $^{13}\text{C}$  NMR spectra of products before and after 12h glycerol anodic oxidation on Ni-Mo-N/CFC electrode, and the spectra of  $\text{HCOO}^-$ ,  $\text{CO}_3^{2-}$ .

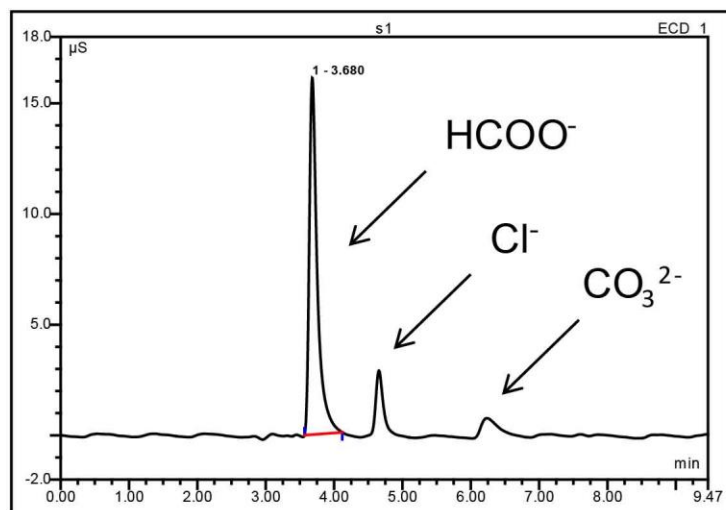

**Supplementary Fig. 17** IC spectrum of products after 12h glycerol anodic oxidation on Ni-Mo-N/CFC electrode.

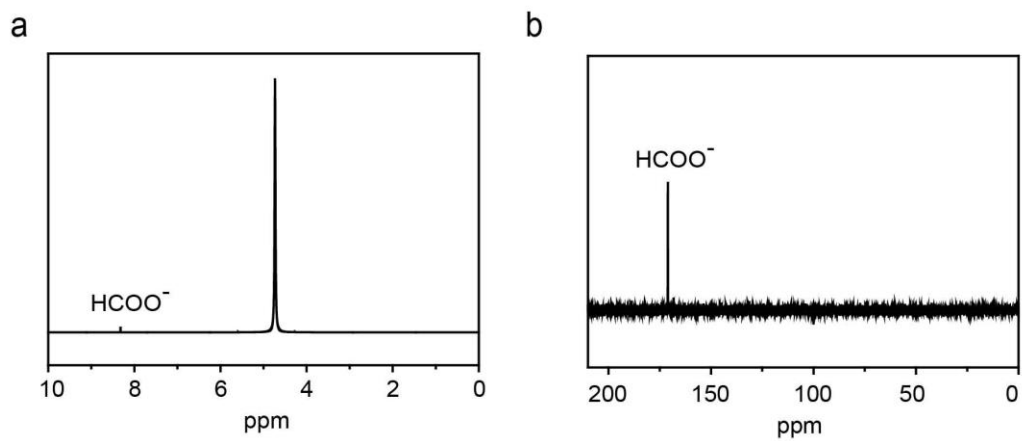

**Supplementary Fig. 18** Product characterization of HER on Ni-Mo-N/CFC electrode with formate. (a)  $^1\text{H}$  NMR and (b)  $^{13}\text{C}$  NMR spectra of products in 1M KOH with 0.1M formate for formate reduction on Ni-Mo-N/CFC electrode.

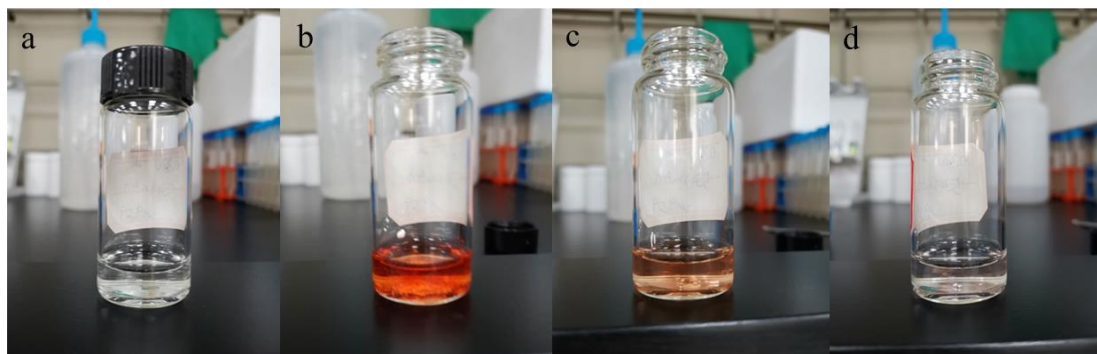

**Supplementary Fig. 19** Qualitative test of formaldehyde by phloroglucinol. Electrolyte after the electrochemical glycerol anodic oxidation with (a) and without (b-d) phloroglucinol. The electrolyte rapidly turns orange when phloroglucinol was added and then quickly shallowed, indicating the presence of formaldehyde.

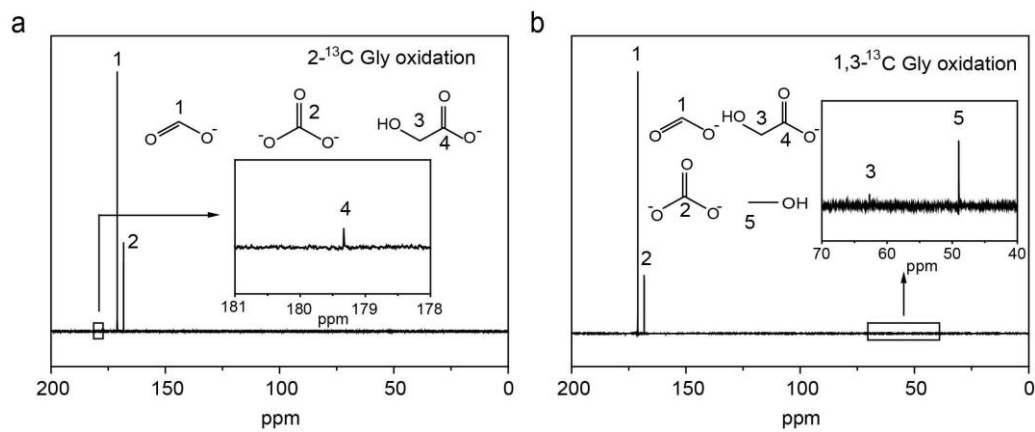

**Supplementary Fig. 20** Product characterization of isotope labeled glycerol oxidation.

$^{13}\text{C}$  NMR spectra for the electro-oxidation of  $2\text{-}^{13}\text{C}$  glycerol (**a**) and  $1,3\text{-}^{13}\text{C}$  glycerol

(**b**).

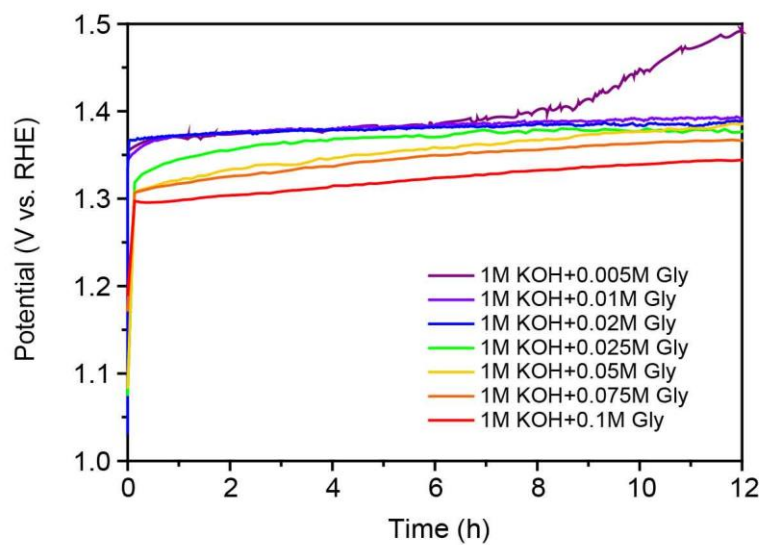

**Supplementary Fig. 21** Chronopotentiometric curves for Ni-Mo-N/CFC of glycerol oxidation in 1 M KOH with varied glycerol concentrations.

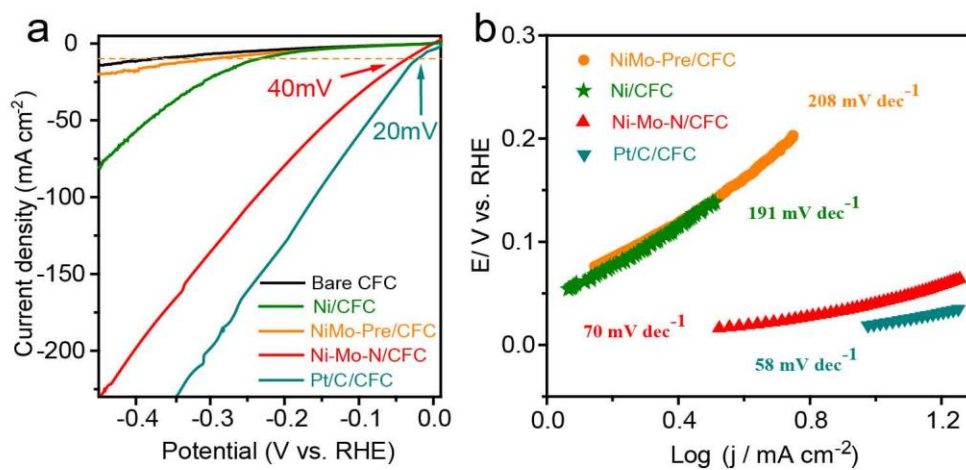

**Supplementary Fig. 22** Electrocatalytic performances of the catalysts for HER. LSV curves of various catalysts cathode **(a)** and corresponding Tafel slopes **(b)** in 1M KOH.

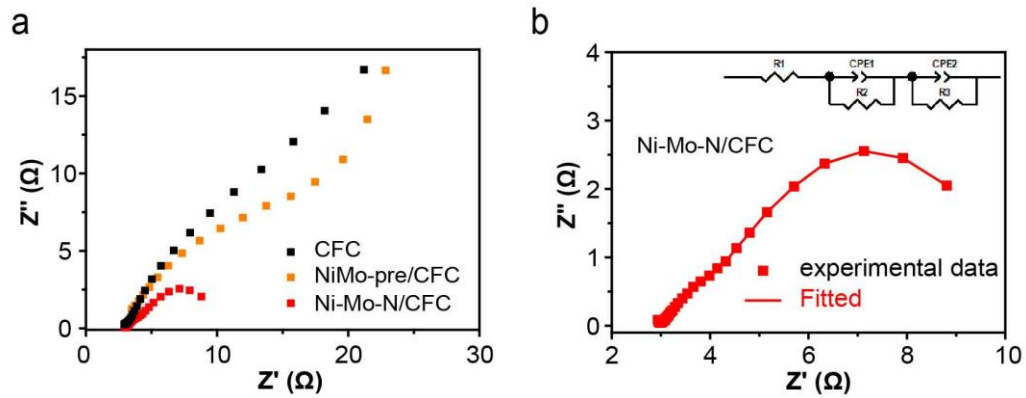

**Supplementary Fig. 23** Electrochemical impedance spectroscopy (EIS) analyses of the catalysts for HER. **(a)** Nyquist plots of Ni-Mo-N/CFC, NiMo-Pre/CFC, and CFC for HER process in 1M KOH. **(b)** The corresponding fitting Nyquist plots for Ni-Mo-N/CFC. Inset in (b) shows the proposed equivalent circuit.



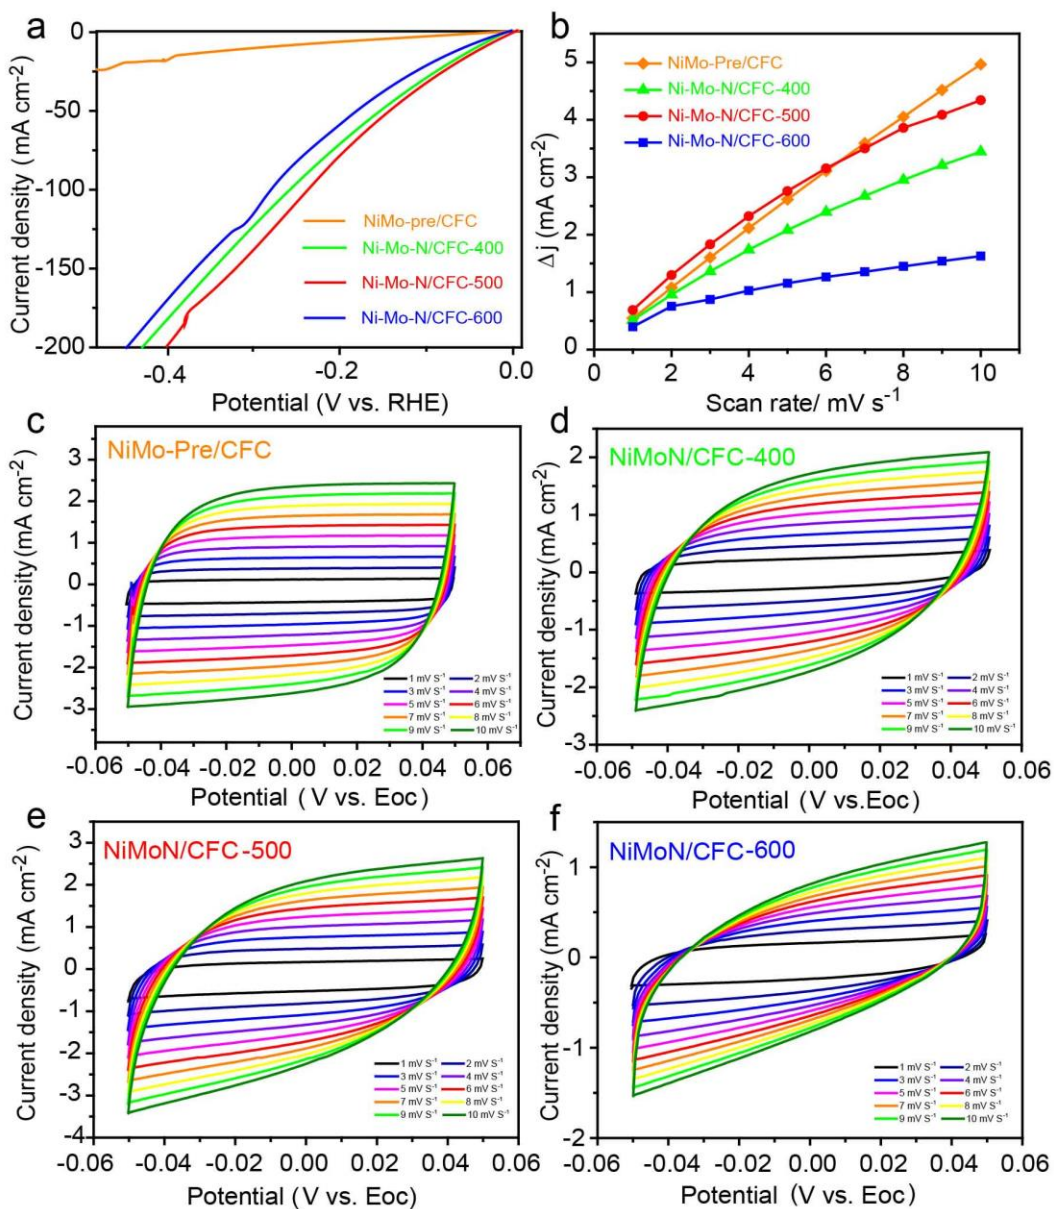

**Supplementary Fig. 24** HER activity tests of Ni-Mo-N/CFC catalysts treated at varied annealing temperatures. **(a)** Polarization curves for the HER of different catalysts. **(b)** Double layer capacitance ( $C_{dl}$ ) of different catalysts. **(c-f)** ECSA tests of different catalysts, the scanning potential range was from -0.050 V to 0.050 V versus open circuit potential (Eoc).  $E_{oc}$   $\text{NiMo-pre/CFC}$  = -0.7 V,  $E_{oc}$   $\text{Ni-Mo-N/CFC-400}$  = -0.338 V,  $E_{oc}$   $\text{Ni-Mo-N/CFC-500}$  = -0.8 V,  $E_{oc}$   $\text{Ni-Mo-N/CFC-600}$  = -0.459 V.

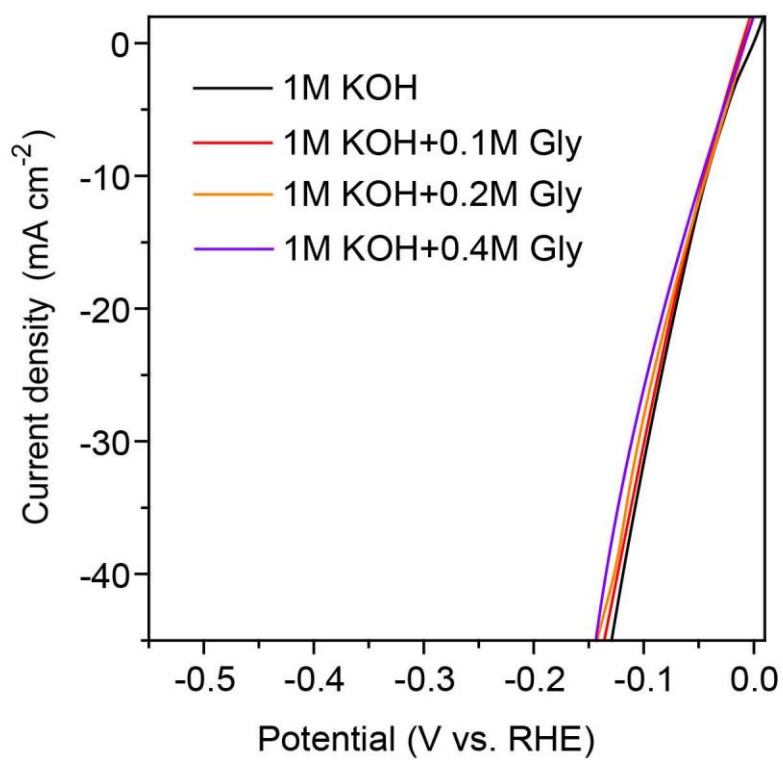

**Supplementary Fig. 25** LSV curves for the HER of Ni-Mo-N/CFC catalyst in 1M KOH with different concentrations of glycerol.

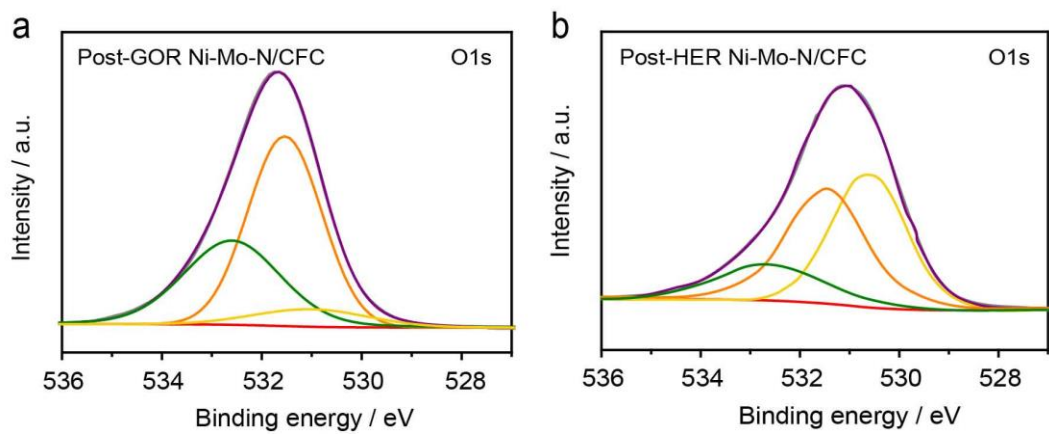

**Supplementary Fig. 26** The O 1s XPS spectra of Ni-Mo-N/CFC after glycerol oxidation and HER CP. **(a)** post-GOR Ni-Mo-N/CFC, **(b)** post-HER Ni-Mo-N/CFC.

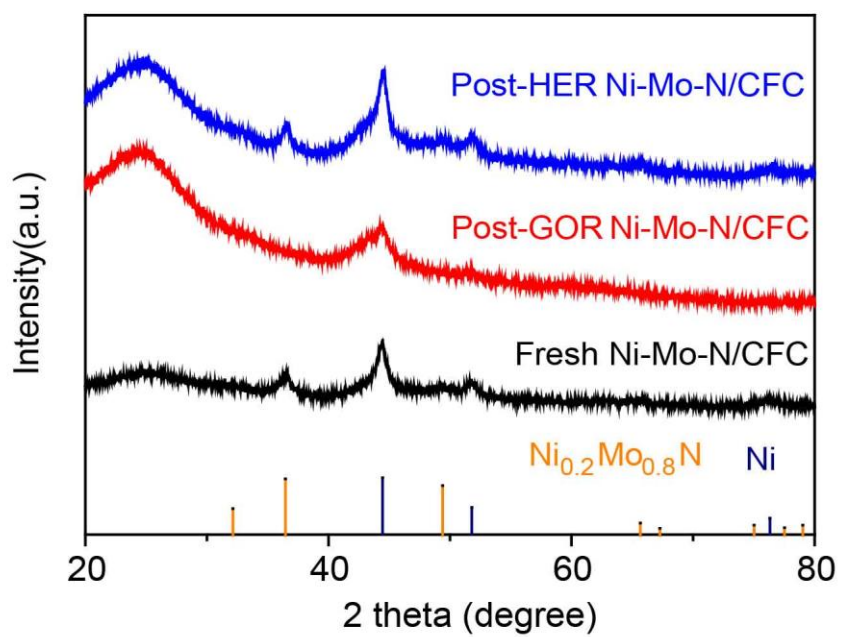

**Supplementary Fig. 27** XRD patterns of fresh, post-GOR, and post-HER Ni-Mo-N/CFC catalysts.

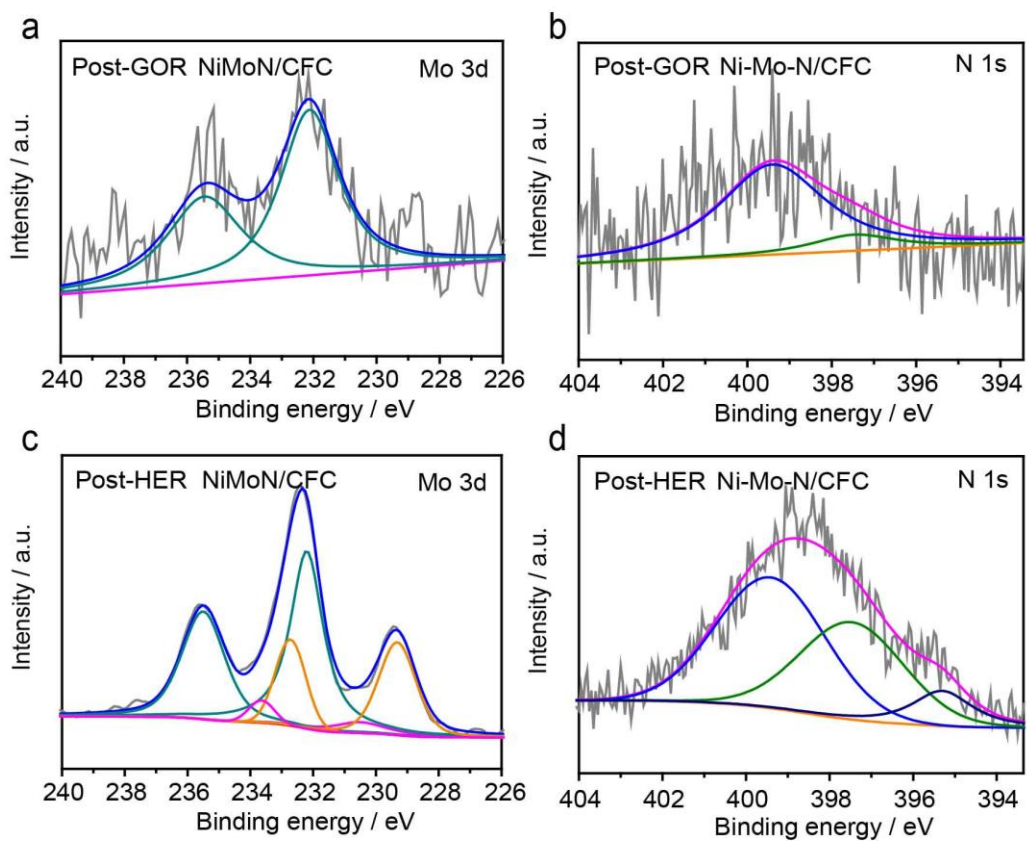

**Supplementary Fig. 28** Mo 3d spectra and N 1s spectra analyses of Ni-Mo-N/CFC after glycerol oxidation and HER CP. High-resolution XPS spectra of post-GOR Ni-Mo-N/CFC: (a) Mo 3d and (b) N 1s-Mo 3p. High-resolution XPS spectra of post-HER Ni-Mo-N/CFC: (c) Mo 3d and (d) N 1s-Mo 3p.

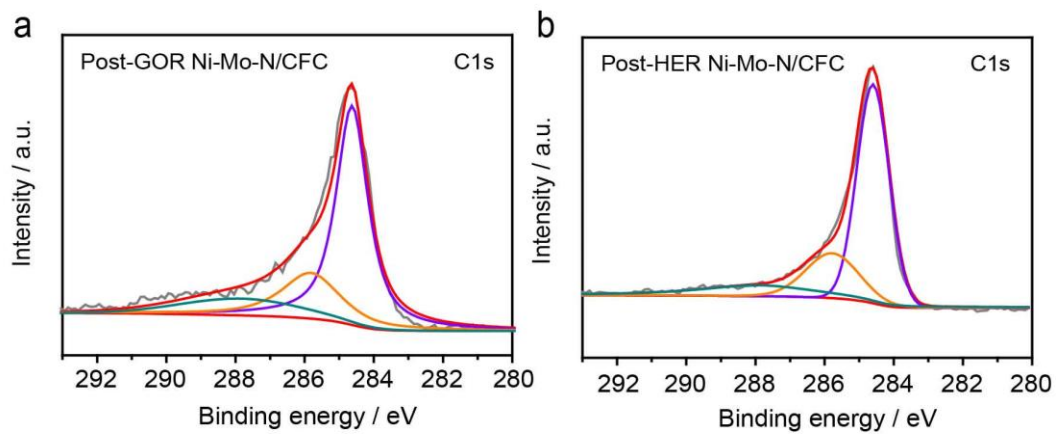

**Supplementary Fig. 29** The C 1s XPS spectra of Ni-Mo-N/CFC after glycerol oxidation and HER CP. (a) post-GOR Ni-Mo-N/CFC, (b) post-HER Ni-Mo-N/CFC.

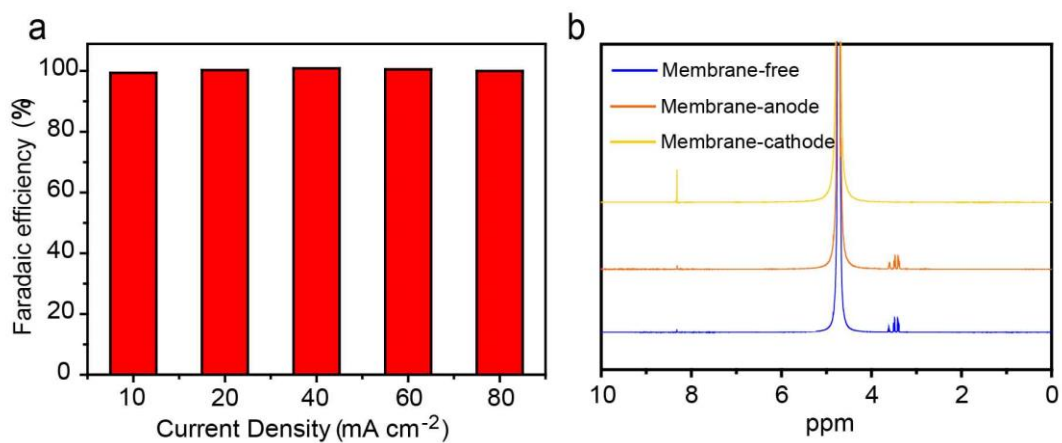

**Supplementary Fig. 30** Cell electrolysis on Ni-Mo-N/CFC couple with a Nafion membrane. **(a)** The FEs of the Ni-Mo-N/CFC couple with a Nafion membrane for H<sub>2</sub> at varied current densities. **(b)** <sup>1</sup>H NMR spectra of products in anode (red) and cathode (orange) electrolytes with membrane and products (blue) in electrolyte without membrane after glycerol electrolysis on Ni-Mo-N/CFC couple.

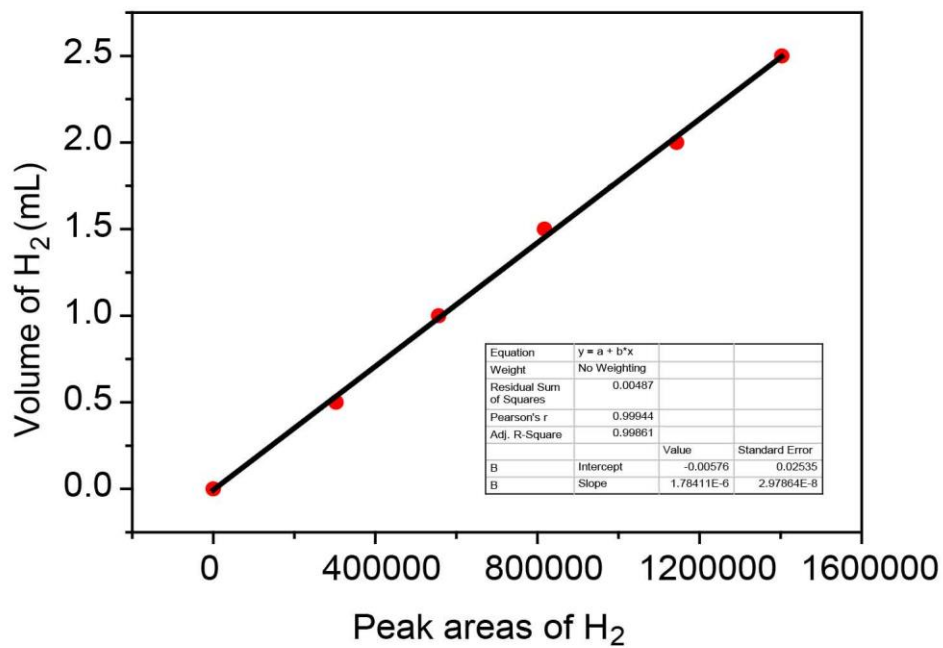

**Supplementary Fig. 31** The standard curve of H<sub>2</sub> production obtained by gas chromatography (nitrogen as a carrier gas) and detected with thermal conductivity detector (TCD).



## Supplementary Tables

**Supplementary Table 1** Ratios of Ni to Mo elements in Ni-Mo-N/CFC catalyst before and after the electrochemical glycerol anodic oxidation and HER as determined by ICP-OES analysis. ST: short time reaction (20 cycles of CV scans). LT: long time reaction (20 cycles of CV scans + 12h CP).

|         | Ni-Mo-N<br>/CFC | post-GOR<br>Ni-Mo-N/CFC<br>ST | post-GOR<br>Ni-Mo-N/CFC<br>LT | post-HER<br>Ni-Mo-N/CFC<br>ST | post-HER<br>Ni-Mo-N/CFC<br>LT |
|---------|-----------------|-------------------------------|-------------------------------|-------------------------------|-------------------------------|
| Ni : Mo | 1:1.90          | 1:0.15                        | 1:0.13                        | 1:1.29                        | 1:1.29                        |

**Supplementary Table 2** Contents of Ni and Mo elements in the electrolyte after the electrochemical glycerol anodic oxidation and HER as determined by ICP-OES analysis.

|             | Ni | Mo      |
|-------------|----|---------|
| post-GOR ST | -  | 3.86ppm |
| post-GOR LT | -  | 3.17ppm |
| post-HER ST | -  | 0.09ppm |
| post-HER LT | -  | 0.09ppm |

**Supplementary Table 3** Ni 2P<sub>3/2</sub> XPS area distribution of various oxidation states and satellite for Ni-Mo-N/CFC catalyst before and after the electrochemical glycerol anodic oxidation and HER.

|           | Ni-Mo-N /CFC | post-GOR<br>Ni-Mo-N/CFC | post-HER<br>Ni-Mo-N/CFC |
|-----------|--------------|-------------------------|-------------------------|
| Ni(0)     | 6%           | 2%                      | 2%                      |
| Ni(II)    | 60%          | 15%                     | 63%                     |
| Ni(III)   | 0%           | 39%                     | 0%                      |
| Satellite | 34%          | 45%                     | 35%                     |

**Supplementary Table 4** Recent reported catalysts for the chemical-assisted hydrogen evolution reaction <sup>b</sup>

| Catalyst                                                  | Electrolyte                                | product                         | three-electrode system  |                         |                         | two-electrode system |                    | Reference |
|-----------------------------------------------------------|--------------------------------------------|---------------------------------|-------------------------|-------------------------|-------------------------|----------------------|--------------------|-----------|
|                                                           |                                            |                                 | $\eta_{\text{HER}}$ (V) | $\eta_{\text{OER}}$ (V) | $\eta_{\text{COR}}$ (V) | E <sub>1</sub> (V)   | E <sub>2</sub> (V) |           |
| Ni-Mo-N/CF<br>C                                           | 1M KOH+0.1 M<br>Glycerol                   | Formate                         | 0.043                   | 1.57                    | 1.30                    | 1.62                 | 1.36               | This work |
| NF/NiMoO-A<br>r                                           | 1M KOH+0.5 M<br>Urea                       | N <sub>2</sub> ,CO <sub>2</sub> | -                       | -                       | 1.37                    | -                    | -                  | 2         |
| Ni-MOF                                                    | 1M KOH+0.33 M<br>Urea                      | N <sub>2</sub> ,CO <sub>2</sub> | -                       | -                       | 1.36                    | -                    | -                  | 3         |
| MnO <sub>2</sub> /MnCo <sub>2</sub><br>O <sub>4</sub> /Ni | 1M KOH+0.5 M<br>Urea                       | N <sub>2</sub> ,CO <sub>2</sub> | -0.2                    | -                       | 1.33                    | -                    | 1.58               | 4         |
| CoSe <sub>2</sub><br>nanosheet                            | 1M KOH+ 0.5M<br>hydrazine                  | -                               | -0.084                  | -                       | -0.017                  | 1.513                | 0.164              | 5         |
| CoCu-UMOF<br>Ns                                           | 1M KOH+3 M<br>Methanol                     | -                               | -                       | 1.597                   | 1.365                   | -                    | -                  | 6         |
| Fe-CoP/CC                                                 | 1M KOH+5mL<br>Aloe extract                 | -                               | -0.359<br>(100)         | 1.707<br>(25)           | 1.572<br>(25)           | 1.57                 | 1.44               | 7         |
| Ni <sub>2</sub> P/Ni/NF                                   | 1M KOH +30mM<br>Furfural                   | Furoic acid                     | -                       | 1.55<br>(onset)         | 1.43<br>(onset)         | 1.59                 | 1.48               | 8         |
| Co <sub>3</sub> O <sub>4</sub> NSs/CP                     | 1M KOH +1M<br>Ethanol                      | Ethyl<br>acetate                | -                       | 1.5                     | 1.445                   | -                    | -                  | 9         |
| NiSe nanorod                                              | 1M KOH + 1mM<br>Benzylamine                | benzonitrile                    | -                       | 1.48<br>(onset)         | 1.32<br>(onset)         | 1.7<br>(20)          | 1.49<br>(20)       | 10        |
| Ni <sub>3</sub> S <sub>2</sub> /NF                        | 1 M KOH+10 mM<br>HMF                       | FDCA                            | -0.16                   | 1.5<br>(onset)          | 1.35<br>(onset)         | 1.58                 | 1.46               | 11        |
| Co <sub>3</sub> O <sub>4</sub><br>NWs/CC                  | 1 M KOH+40 mg<br>L <sup>-1</sup> triclosan | Phenol                          | -                       | 1.59                    | 1.54                    | -                    | -                  | 12        |

<sup>b</sup> All the potentials here are V vs. RHE. All the potentials correspond to 10 mA cm<sup>-2</sup> unless otherwise marked. Numbers in parentheses are current densities in mA cm<sup>-2</sup>.  $\eta_{\text{COR}}$ : potential for chemical oxidation. E<sub>1</sub>: cell voltage for overall water-splitting. E<sub>2</sub>: cell voltage for the organic oxidation integrated HER.

## Supplementary Note 1

Theoretical Gibb's free energy ( $\Delta G$ ) and potential (E) of reaction for the anodic electro-oxidation of glycerol ( $C_3H_8O_3$ ) to formic acid (HCOOH) coupled to the cathodic HER (Standard molar free energy of formation ( $\Delta G_f$ ):  $C_3H_8O_3$  (l): -478.6 KJ mol<sup>-1</sup>,  $H_2O$  (l): -237.13 KJ mol<sup>-1</sup>,  $OH^-$  (l): -157.244 KJ mol<sup>-1</sup>, HCOOH (l): -361.3 KJ mol<sup>-1</sup>):

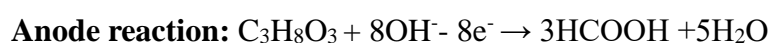

$$\Delta G_{\text{Anode reaction}} = -532.998 \text{ KJ mol}^{-1} \quad E_{\text{Anode reaction}} = 0.69 \text{ V}$$

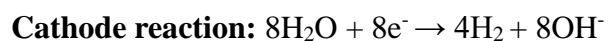

$$\Delta G_{\text{Cathode reaction}} = 639.088 \text{ KJ mol}^{-1} \quad E_{\text{Cathode reaction}} = -0.83 \text{ V}$$

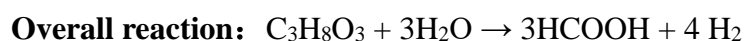

$$\Delta G_{\text{Overall reaction}} = 106.09 \text{ KJ mol}^{-1} \quad E_{\text{Overall reaction}} = -0.137 \text{ V}$$

## Supplementary References

- 1 Ashok, A. et al. Single Step Synthesis of Porous NiCoO<sub>2</sub> for Effective Electrooxidation of Glycerol in Alkaline Medium. *J. Electrochem. Soc.* **165**, J3301-J3309 (2018).
- 2 Yu, Z. Y. et al. Ni–Mo–O nanorod-derived composite catalysts for efficient alkaline water-to-hydrogen conversion via urea electrolysis. *Energy Environ. Sci.* **11**, 1890-1897 (2018).
- 3 Zhu, D. et al. Two-dimensional metal-organic frameworks with high oxidation states for efficient electrocatalytic urea oxidation. *Chem. Commun.* **53**, 10906-10909 (2017).
- 4 Xiao, C. et al. MnO<sub>2</sub>/MnCo<sub>2</sub>O<sub>4</sub>/Ni heterostructure with quadruple hierarchy: a bifunctional electrode architecture for overall urea oxidation. *J. Mater. Chem. A* **5**, 7825-7832 (2017).
- 5 Zhang, J. Y. et al. Anodic Hydrazine Oxidation Assists Energy-Efficient Hydrogen Evolution over a Bifunctional Cobalt Perselenide Nanosheet Electrode. *Angew. Chem. Int. Ed.* **57**, 7649-7653 (2018).
- 6 Wei, X. F. et al. Metal-Organic Framework Nanosheet Electrocatalysts for Efficient H<sub>2</sub> Production from Methanol Solution: Methanol-Assisted Water Splitting or Methanol Reforming? *ACS Appl. Mater. Interfaces* **10**, 25422-25428 (2018).
- 7 Hao, S. et al. Integrating natural biomass electro-oxidation and hydrogen evolution: using a porous Fe-doped CoP nanosheet array as a bifunctional

- catalyst. *Chem. Commun.* **53**, 5710-5713 (2017).
- 8 Jiang N. et al. Electrocatalysis of Furfural Oxidation Coupled with H<sub>2</sub> Evolution via Nickel-based Electrocatalysts in Water. *ChemNanoMat* **3**, 491-495 (2017).
- 9 Dai, L. et al. Electrochemical Partial Reforming of Ethanol into Ethyl Acetate Using Ultrathin Co<sub>3</sub>O<sub>4</sub> Nanosheets as a Highly Selective Anode Catalyst. *ACS Cent. Sci.* **2**, 538-544 (2016).
- 10 Huang, Y. et al. Boosting Hydrogen Production by Anodic Oxidation of Primary Amines over a NiSe Nanorod Electrode. *Angew. Chem. Int. Ed.* **57**, 13163-13166 (2018).
- 11 You, B. et al. A General Strategy for Decoupled Hydrogen Production from Water Splitting by Integrating Oxidative Biomass Valorization. *J. Am. Chem. Soc.* 13639-13646 (2016).
- 12 Lyu, C. et al. Homologous Co<sub>3</sub>O<sub>4</sub>||CoP nanowires grown on carbon cloth as a high-performance electrode pair for triclosan degradation and hydrogen evolution. *Mater. Chem. Front.* **2**, 323-330 (2018).
